# Supplementary material for: Pyrolysis and oxidation of benzene and cyclopentadiene by NOx: a ReaxFF molecular dynamics study
Source: Royal Society of Chemistry journal article supplement (doi:10.1039/d2cp04413g), 2023-01-01
Supplement: d2cp04413g1.pdf [file d2cp04413g1.pdf]

1 Supplemental Material for

2 **Pyrolysis and oxidation of benzene and cyclopentadiene by NO<sub>x</sub>: A ReaxFF molecular dynamics study**

3 Ying Wang<sup>a</sup>, Lei Zhou<sup>a</sup>, Qian Mao<sup>b,c\*</sup>, Zhanyuan Wang<sup>a</sup>, Haiqiao Wei<sup>a\*</sup>

4 <sup>a</sup> State Key Laboratory of Engines, Tianjin University, Tianjin 300072, China

5 <sup>b</sup> Institute of Technology for Nanostructures, University Duisburg-Essen, Duisburg 47057, Germany

6 <sup>c</sup> Institute of Engineering Thermophysics, Chinese Academy of Sciences, Beijing 100190, China

7 \*Corresponding authors: qian.mao@uni-due.de (Qian Mao); whq@tju.edu.cn (Haiqiao Wei)

## 8 1. Verification of the ReaxFF force field

9 The CHON-2019 force field [1] used in the present system is trained on the basis of the CHO-2016 force  
10 field by Ashraf and van Duin [2] and added the N atom type in the force field. Notably, CHO-2016 is trained  
11 for C/H/O chemistry, especially for the chemistry of small molecules, which is suitable to simulate the  
12 oxidation and pyrolysis of benzene and cyclopentadiene. In the present work, we focus on the bond dissociation  
13 energies (BDEs) of NO<sub>x</sub> because the decomposition of NO<sub>x</sub> is the initiation step at high temperatures. Table  
14 S1 shows the bond dissociation energies of NO<sub>2</sub> and NO with quantum chemistry methods [3] and all the 9  
15 sets of C/H/O/N force fields (including CHON-2019 and 8 additional sets of force fields containing  
16 information on C/H/O/N species from the literature [4-11], which are represented by ReaxFF-1 to ReaxFF-8  
17 respectively). CHON-2019 is the only force field which the relative differences in both BDE of NO and NO<sub>2</sub>  
18 are less than 10% compared to CBS-QB3.

19 **Table R1. Bond dissociation energies of NO<sub>2</sub> and NO with quantum chemistry methods and the**

20 **ReaxFF Force Field (Unit: kcal/mol)**

|                  | BDE of NO <sub>2</sub> | relative difference from<br>CBS-QB3 (%) | BDE of NO | relative difference from<br>CBS-QB3 (%) |
|------------------|------------------------|-----------------------------------------|-----------|-----------------------------------------|
| CBS-QB3          | 74.20                  | --                                      | 151.68    | --                                      |
| ReaxFF CHON-2019 | 73.42757               | 1.0410108                               | 160.65    | 5.91376582                              |

|          |           |            |           |            |
|----------|-----------|------------|-----------|------------|
| ReaxFF-1 | 115.09381 | 55.1129515 | 148.96428 | 1.7904272  |
| ReaxFF-2 | 92.93069  | 25.2435175 | 128.98049 | 14.965394  |
| ReaxFF-3 | 88.18082  | 18.8420755 | 156.28749 | 3.03763845 |
| ReaxFF-4 | 88.03454  | 18.6449326 | 145.09197 | 4.3433742  |
| ReaxFF-5 | 94.22266  | 26.984717  | 148.56242 | 2.0553666  |
| ReaxFF-6 | 88.02452  | 18.6314286 | 145.09197 | 4.3433742  |
| ReaxFF-7 | 84.12326  | 13.3736658 | 126.74232 | 16.440981  |
| ReaxFF-8 | 63.35861  | 14.611038  | 169.94741 | 12.0433874 |

21

## 22 2. Oxidation of C<sub>6</sub>H<sub>6</sub> and c-C<sub>5</sub>H<sub>6</sub> by O<sub>2</sub>

23 O<sub>2</sub> is one of the most common oxidants in the combustion process. C<sub>18</sub>H<sub>15</sub> and C<sub>13</sub>H<sub>11</sub> are the largest  
 24 species that appear in C<sub>6</sub>H<sub>6</sub> and c-C<sub>5</sub>H<sub>6</sub> systems with the addition of O<sub>2</sub>, indicating that O<sub>2</sub> inhibits the growth  
 25 of species to some extent. Compared with the reactions that occur in the pyrolysis system, Fig. S1 shows that  
 26 the types of the initial step are more varied as a result of the modification of the composition of the radical  
 27 pool. O<sub>2</sub> is rarely involved in the oxidation of C<sub>6</sub>H<sub>6</sub> or c-C<sub>5</sub>H<sub>6</sub> directly, as can be seen from the last column.  
 28 The chain-branching reaction via H and O<sub>2</sub> producing O and OH is the most important source to broad the  
 29 radical pool.

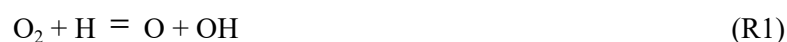

30 The reactions of O or OH with reactants are carried out by two routes: H-abstraction and addition reaction. H-  
 31 abstraction is proposed:

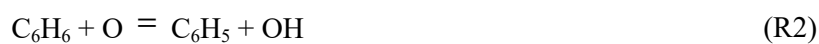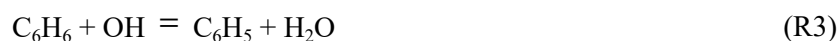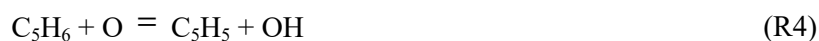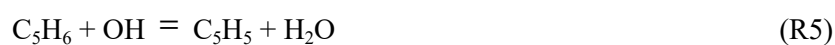

32 For the addition reaction by OH, OH attacks on C<sub>6</sub>H<sub>6</sub> and c-C<sub>5</sub>H<sub>6</sub>, leading to ring-opening via C-C β-scission  
 33 as shown by pathways (1) and (2).

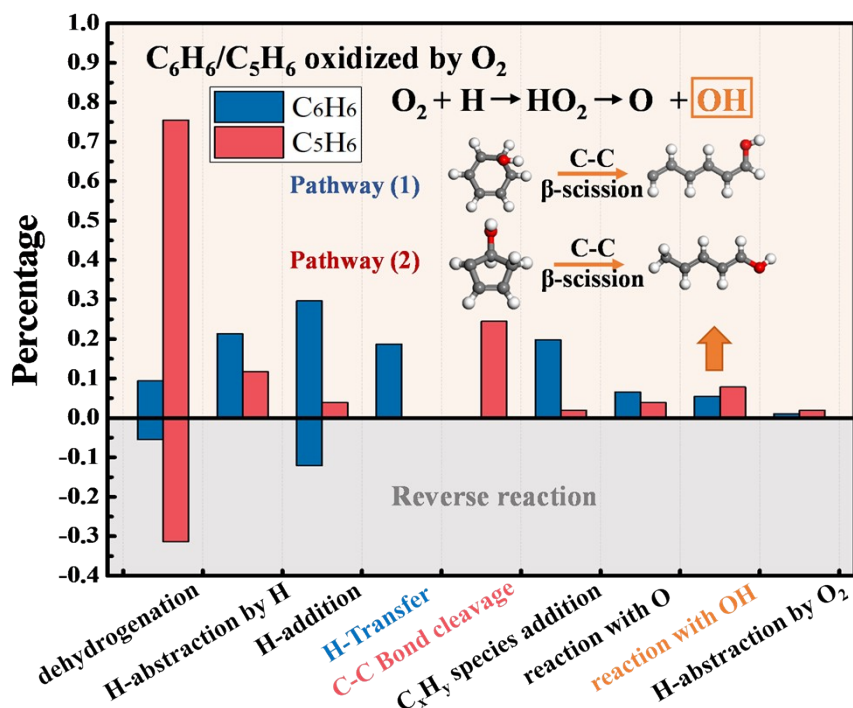

34  
 35 **Fig. S1 Proportion of different first-step reactions of C<sub>6</sub>H<sub>6</sub> (blue columns) and c-C<sub>5</sub>H<sub>6</sub> (red columns) in**  
 36 **the presence of O<sub>2</sub> at 2500 K.**

37

38 **Reference:**

39 [1] M. Kowalik, C. Ashraf, B. Damirchi, D. Akbarian, S. Rajabpour, A.C. Van Duin, Atomistic scale analysis  
 40 of the carbonization process for C/H/O/N-based polymers with the ReaxFF reactive force field, J. Phys. Chem.  
 41 B 123 (2019) 5357-5367.

42 [2] C. Ashraf, A.C. Van Duin, Extension of the ReaxFF combustion force field toward syngas combustion and  
 43 initial oxidation kinetics, J. Phys. Chem. A 121 (2017) 1051-1068.

44 [3] R.D. Bach, H.B. Schlegel, The bond dissociation energy of the N-O bond, J. Phys. Chem. A 125 (2021)  
 45 5014-5021.

46 [4] A.D. Kulkarni, D.G. Truhlar, S. Goverapet Srinivasan, A.C.T. van Duin, P. Norman, T.E.  
47 Schwartzentruber, Oxygen Interactions with Silica Surfaces: Coupled Cluster and Density Functional  
48 Investigation and the Development of a New ReaxFF Potential, *J. Phys. Chem. C* 117 (2012) 258-269.

49 [5] A.M. Kamat, A.C.T. van Duin, A. Yakovlev, Molecular Dynamics Simulations of Laser-Induced  
50 Incandescence of Soot Using an Extended ReaxFF Reactive Force Field, *J. Phys. Chem. A* 114 (2010) 12561-  
51 12572.

52 [6] L. Zhang, A.C.T.v. Duin, S.V. Zybin, W.A. Goddard Iii, Thermal Decomposition of Hydrazines from  
53 Reactive Dynamics Using the ReaxFF Reactive Force Field, *J. Phys. Chem. B* 113 (2009) 10770-10778.

54 [7] D.A. Newsome, D. Sengupta, H. Foroutan, M.F. Russo, A.C.T. van Duin, Oxidation of Silicon Carbide by  
55 O<sub>2</sub> and H<sub>2</sub>O: A ReaxFF Reactive Molecular Dynamics Study, Part I, *J. Phys. Chem. C* 116 (2012) 16111-  
56 16121.

57 [8] L. Liu, Y. Liu, S.V. Zybin, H. Sun, W.A. Goddard, 3rd, ReaxFF-lg: correction of the ReaxFF reactive force  
58 field for London dispersion, with applications to the equations of state for energetic materials, *J. Phys. Chem.*  
59 *A* 115 (2011) 11016-11022.

60 [9] B.V. Merinov, J.E. Mueller, A.C. van Duin, Q. An, W.A. Goddard, 3rd, ReaxFF Reactive Force-Field  
61 Modeling of the Triple-Phase Boundary in a Solid Oxide Fuel Cell, *J. Phys. Chem. Lett.* 5 (2014) 4039-4043.

62 [10] G. Psfogiannakis, A.C.T. van Duin, Development of a ReaxFF reactive force field for Si/Ge/H systems  
63 and application to atomic hydrogen bombardment of Si, Ge, and SiGe (100) surfaces, *Surf. Sci.* 646 (2016)  
64 253-260.

65 [11] B. Zhang, A.C. van Duin, J.K. Johnson, Development of a ReaxFF reactive force field for  
66 tetrabutylphosphonium glycinate/CO<sub>2</sub> mixtures, *J. Phys. Chem. B* 118 (2014) 12008-12016.

67
